# Supplementary figures and images for: Periodicity of SNP distribution around transcription start sites
Source: Springer Nature journal article supplement (doi:10.1186/1471-2164-7-66), 2006-04-03

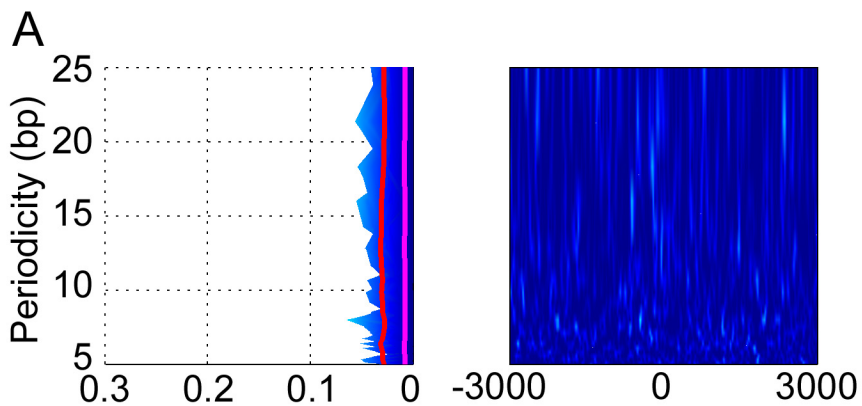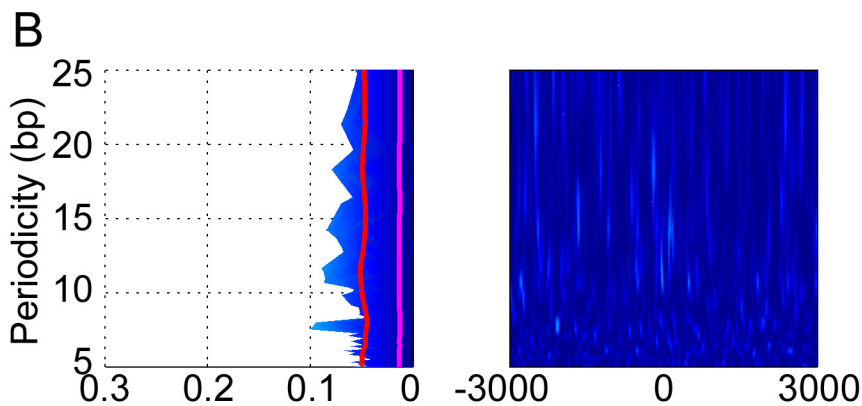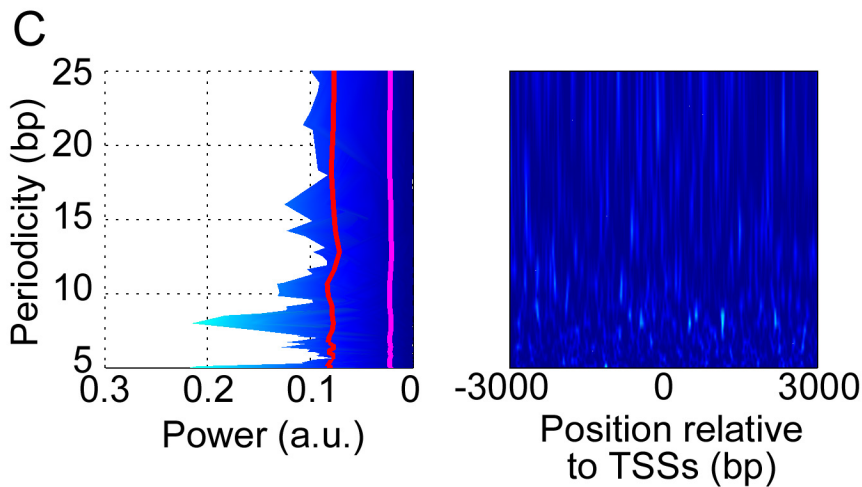

Supplement: Additional file 3 [file 1471-2164-7-66-s3.pdf]
